# Supplementary material for: Metabolite Genome-Wide Association Study for Indoleamine 2,3-Dioxygenase Activity Associated with Chronic Kidney Disease
Source: MDPI journal article supplement (doi:10.3390/genes12121905), 2021-11-27
Supplement: s1 [file s1]

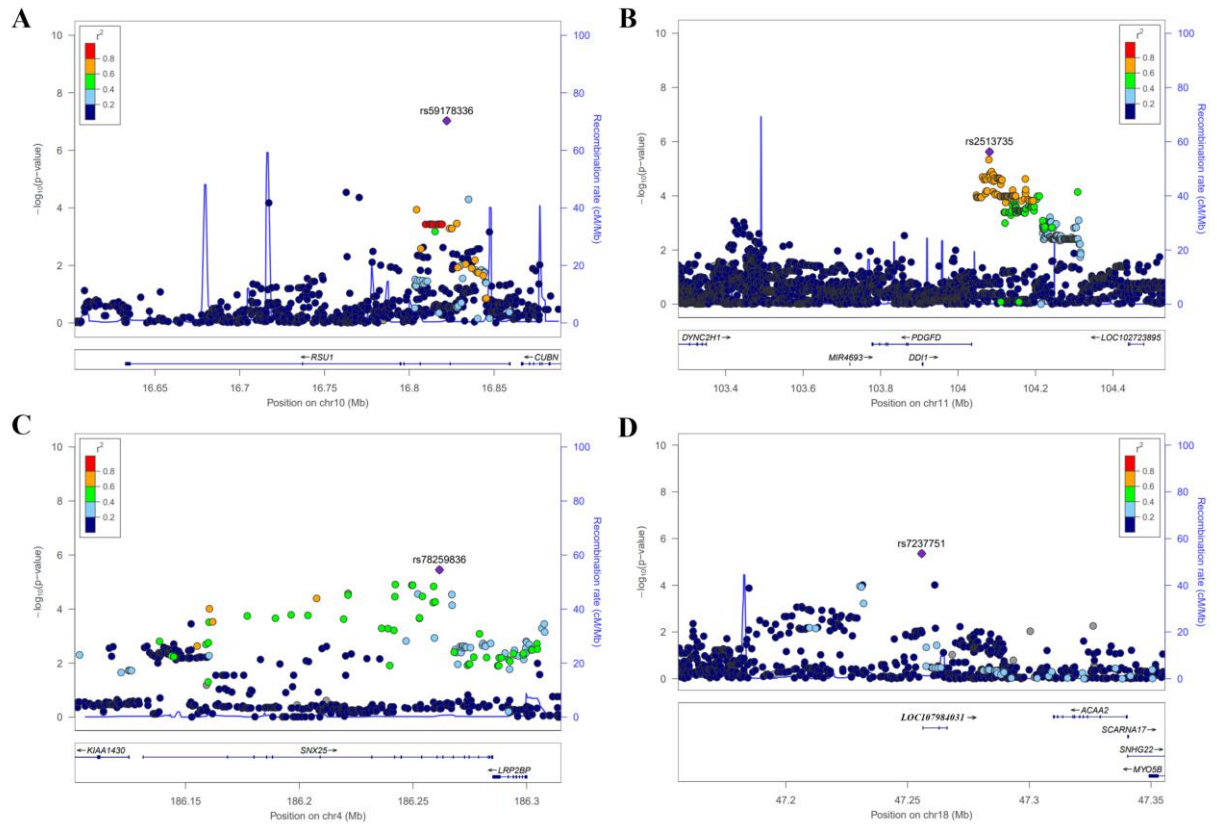

Figure S1: Regional association plots of IDO activity at 10p13, 1p12, 4q35.1, and 18q21.1 loci. The statistical significances between the SNPs near *RSU1* (A), *PDGFD* (B), *SNX25* (C), and *LOC107984031* (D) genes and IDO activity are plotted as  $-\log_{10} p$  values. The purple diamond represents the SNP most strongly associated with IDO activity. Levels of linkage disequilibrium ( $r^2$ ) of top SNPs and surrounding SNPs are shown in different colors. The regional plots for SNPs were generated via LocusZoom browser (<http://locuszoom.org/> (accessed on 16 September 2021)).

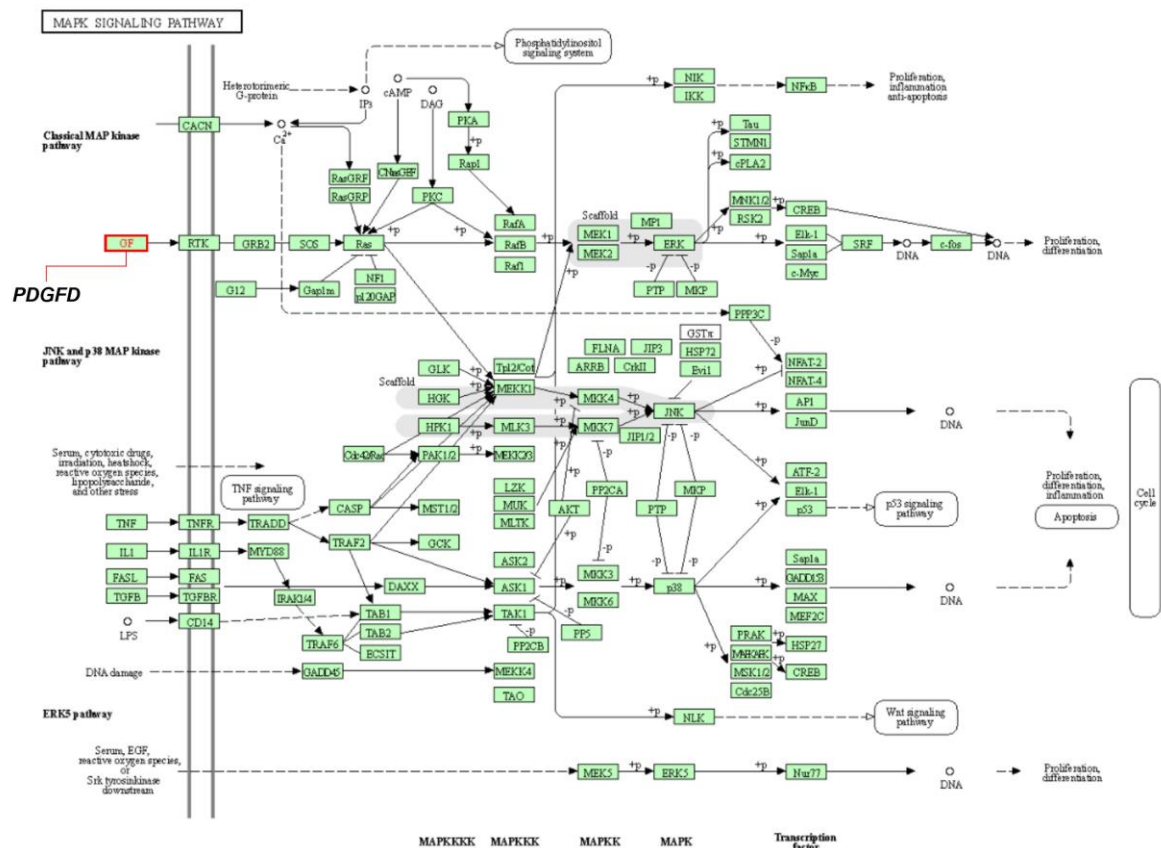

Figure S2: The KEGG pathway for MAPK signaling pathway. A red box indicates the *PDGFD* gene found in growth factor (GF) according to KEGG. The image of a pathway was generated via KEGG browser (<https://www.genome.jp/kegg/> (accessed on 2 September 2021)).
