# Supplementary material for: Metabolite Genome-Wide Association Study for Indoleamine 2,3-Dioxygenase Activity Associated with Chronic Kidney Disease
Source: Genes (Basel). 2021 Nov 27;12(12):1905. doi: 10.3390/genes12121905 (PMC8701662; doi:10.3390/genes12121905)
Supplement: Supplementary file 1 [file genes-12-01905-s001.zip › Table S1_20210916.xlsx]

## Sheet: Supplementory Table 1
	Table S1. Rare variants associated with indoleamine 2,3-dioxygenase activity in Koreans.
	No.	SNP	Nearest gene	Chromosome position	Minor allele	MAF	HWE p-value	Function	IDO activity		eGFR		CKD
									β ± S.E	p-value	β ± S.E	p-value	OR (95% CI)	p-value
	1	rs12732074	ST6GALNAC3	1:76554834	C	0.01028	1	Intron	0.66 ± 0.14	3.05 × 10–6	-1.59 ± 1.44	0.269	1.05 (0.24-4.66)	0.9452
	2	rs139248096	ADH5P2	1:80140413	A	0.009694	0.2132	-	0.74 ± 0.14	1.62 × 10–7	-3.39 ± 1.45	0.01908	2.09 (0.53-8.17)	0.2909
	3	rs76796315	ADH5P2	1:80144685	C	0.02559	0.6839	-	0.41 ± 0.09	4.96 × 10–6	-1.65 ± 0.91	0.06961	1.33 (0.55-3.20)	0.5213
	4	rs150485509	ABCA4	1:94601728	C	0.01512	1	-	0.59 ± 0.12	4.42 × 10–7	-1.66 ± 1.19	0.162	4.65 (1.70-12.72)	0.002758
	5	rs113313322	SLC44A3-AS1	1:95104117	I	0.0095	1	Intron	0.67 ± 0.15	4.78 × 10–6	-3.00 ± 1.49	0.04469	2.13 (0.60-7.59)	0.2447
	6	rs185455343	IGSF3	1:117166369	A	0.0128	1	Intron	0.59 ± 0.13	3.00 × 10–6	-2.94 ± 1.29	0.0228	2.42 (0.81-7.28)	0.1145
	7	rs78407218	NID1	1:236144755	T	0.009694	0.02274	Intron	0.66 ± 0.14	2.25 × 10–6	-2.93 ± 1.42	0.03957	1.48 (0.47-4.61)	0.5038
	8	rs192955626	MTR	1:237100806	A	0.01221	0.3184	-	0.59 ± 0.13	3.92 × 10–6	-1.86 ± 1.30	0.1523	1.76 (0.53-5.85)	0.355
	9	rs77364376	CHRM3	1:239542480	G	0.0126	0.3353	-	0.57 ± 0.12	6.03 × 10–6	-0.15 ± 1.28	0.9079	0.53 (0.16-1.72)	0.2894
	10	rs145944588	LOC100996637	2:504829	T	0.01299	1	-	0.62 ± 0.12	7.05 × 10–7	-1.90 ± 1.28	0.1376	2.61 (0.97-6.99)	0.05678
	11	rs58371646	CIB4	2:26855640	D	0.01163	1	Intron	0.63 ± 0.13	2.48 × 10–6	-1.97 ± 1.36	0.1492	1.28 (0.42-3.89)	0.6638
	12	rs72797538	LOC105374674	2:55378110	T	0.04246	0.3255	Intron	0.32 ± 0.07	4.71 × 10–6	-0.68 ± 0.73	0.3459	1.12 (0.56-2.24)	0.7412
	13	rs145275186	LINC01122	2:59205587	G	0.01629	1	Intron	0.50 ± 0.11	7.67 × 10–6	-1.53 ± 1.15	0.1828	0.92 (0.31-2.74)	0.8763
	14	rs181841129	IL1RL1	2:102894456	G	0.008918	1	-	0.67 ± 0.15	7.58 × 10–6	-2.45 ± 1.54	0.1116	1.09 (0.26-4.60)	0.9067
	15	rs75140408	THSD7B	2:138441596	T	0.019	0.06296	-	0.49 ± 0.10	7.48 × 10–6	-3.06 ± 1.03	0.003015	1.04 (0.36-3.06)	0.937
	16	rs79255269	LRP1B	2:141428022	A	0.009112	1	Intron	0.81 ± 0.15	6.13 × 10–8	-3.13 ± 1.52	0.03997	1.88 (0.50-7.06)	0.3516
	17	rs150956278	LOC105373718	2:161502652	A	0.0095	1	Intron	0.66 ± 0.15	5.48 × 10–6	1.68 ± 1.49	0.2592	1.01 (0.26-3.94)	0.9907
	18	rs199830282	SCN3A	2:166006351	D	0.01163	1	Intron	0.61 ± 0.13	3.57 × 10–6	-0.94 ± 1.35	0.4849	2.17 (0.75-6.29)	0.154
	19	rs146148768	XIRP2	2:168006152	T	0.0157	1	Intron	0.52 ± 0.11	4.95 × 10–6	-1.59 ± 1.17	0.1741	1.17 (0.42-3.29)	0.7605
	20	rs149736491	HAGLR	2:177038604	D	0.01648	1	Intron	0.52 ± 0.11	3.72 × 10–6	0.51 ± 1.16	0.6565	0.78 (0.24-2.50)	0.6772
	21	rs151221456	HAGLR	2:177087391	D	0.03238	1	-	0.40 ± 0.08	7.92 × 10–7	-0.36 ± 0.83	0.6619	1.41 (0.69-2.88)	0.3474
	22	rs143783596	TWIST2	2:239691593	T	0.01183	1	-	0.63 ± 0.13	1.77 × 10–6	-0.26 ± 1.34	0.8488	2.19 (0.75-6.41)	0.1505
	23	rs116900966	CACNA2D3	3:54847518	G	0.02268	0.6415	Intron	0.48 ± 0.10	6.38 × 10–7	-1.67 ± 0.98	0.09005	1.21 (0.49-2.96)	0.6775
	24	rs188289326	CACNA2D3	3:54867936	A	0.01008	1	Intron	0.81 ± 0.14	1.02 × 10–8	-2.34 ± 1.45	0.1071	1.52 (0.48-4.81)	0.4748
	25	rs138934208	CACNA2D3	3:55165733	C	0.009306	1	-	0.66 ± 0.15	6.61 × 10–6	-0.66 ± 1.51	0.66	0.53 (0.14-2.06)	0.3604
	26	rs78247959	SYNPR	3:63615673	G	0.04478	0.09947	-	-0.30 ± 0.07	8.07 × 10–6	0.07 ± 0.69	0.9172	1.39 (0.72-2.68)	0.3267
	27	rs192176260	EPHA6	3:97238785	T	0.01163	1	Intron	0.63 ± 0.13	2.05 × 10–6	-1.74 ± 1.35	0.1987	1.65 (0.47-5.72)	0.4342
	28	rs146337248	LOC105374060	3:118130526	C	0.007949	0.1481	-	0.69 ± 0.16	8.45 × 10–6	-2.32 ± 1.59	0.1438	1.35 (0.44-4.14)	0.5999
	29	rs56974143	COL6A6	3:130244478	G	0.01028	1	Intron	0.65 ± 0.14	3.43 × 10–6	-3.17 ± 1.44	0.02721	1.22 (0.37-4.05)	0.746
	30	rs143623615	CPA3	3:148627617	G	0.01241	1	-	0.61 ± 0.13	1.57 × 10–6	-2.25 ± 1.31	0.08602	3.37 (1.17-9.74)	0.02452
	31	rs1215815678	IQCJ, IQCJ-SCHIP1	3:158802707	I	0.03102	0.5162	Intron	0.41 ± 0.08	5.75 × 10–7	-0.91 ± 0.84	0.2805	1.57 (0.68-3.59)	0.2892
	32	rs142787755	IQCJ, IQCJ-SCHIP1	3:158843078	G	0.01512	1	Intron	0.55 ± 0.12	2.65 × 10–6	-0.96 ± 1.20	0.4229	2.16 (0.77-6.08)	0.1433
	33	rs149077024	SCHIP1,IQCJ-SCHIP1	3:159005225	T	0.04013	1	Intron	0.32 ± 0.07	9.57 × 10–6	-0.89 ± 0.74	0.2263	1.46 (0.81-2.66)	0.2112
	34	rs144659527	IL12A-AS1	3:159706050	T	0.01396	1	Intron	0.55 ± 0.12	5.79 × 10–6	-1.67 ± 1.24	0.1761	1.29 (0.44-3.79)	0.6389
	35	rs113114483	DGKG	3:186071238	A	0.01978	1	Intron	0.50 ± 0.10	6.56 × 10–7	-3.15 ± 1.03	0.002306	2.03 (0.86-4.79)	0.1051
	36	rs74402453	SORCS2	4:7311189	G	0.01997	0.6249	Intron	0.49 ± 0.10	1.81 × 10–6	-3.79 ± 1.04	0.000282	2.07 (0.90-4.79)	0.08776
	37	rs150615028	PCDH7	4:30437946	C	0.01629	0.4969	-	0.54 ± 0.11	1.01 × 10–6	-0.79 ± 1.13	0.4885	1.99 (0.76-5.19)	0.1613
	38	rs141006159	PCDH7	4:30463423	A	0.01493	0.4378	-	0.58 ± 0.12	5.60 × 10–7	-2.23 ± 1.18	0.05848	2.77 (1.09-7.04)	0.03178
	39	rs118053400	PCDH7	4:30678317	A	0.01028	1	-	0.66 ± 0.14	3.42 × 10–6	-2.19 ± 1.45	0.1313	2.43 (0.72-8.18)	0.1517
	40	rs147915678	SCFD2	4:54046047	A	0.01435	1	Intron	0.55 ± 0.12	5.01 × 10–6	-1.67 ± 1.23	0.1727	1.72 (0.61-4.84)	0.3042
	41	rs138147033	HMGN1P11	4:63437068	T	0.01066	1	-	0.72 ± 0.14	1.69 × 10–7	-2.31 ± 1.41	0.1018	0.99 (0.30-3.22)	0.9845
	42	4:63466538:A_ATT	HMGN1P11	4:63466538	I	0.01144	1	-	0.64 ± 0.13	1.81 × 10–6	-2.67 ± 1.36	0.04995	1.33 (0.42-4.20)	0.6305
	43	rs76575136	LINC01217	4:101718952	T	0.01493	1	-	0.54 ± 0.12	3.18 × 10–6	0.37 ± 1.20	0.7569	0.78 (0.26-2.31)	0.6504
	44	rs62331809	LOC101927414	4:138570365	T	0.02501	0.4078	Intron	0.45 ± 0.09	9.66 × 10–7	-0.55 ± 0.93	0.5582	1.18 (0.51-2.72)	0.698
	45	rs182145739	LOC105377444	4:138651320	T	0.01144	1	Intron	0.82 ± 0.13	8.46 × 10–10	-1.08 ± 1.36	0.4265	1.69 (0.59-4.78)	0.3263
	46	rs138213090	LINC02172	4:138700686	I	0.03587	0.2581	-	0.34 ± 0.08	9.49 × 10–6	0.48 ± 0.78	0.5441	0.97 (0.47-1.98)	0.9317
	47	rs58332670	MTHFD2P4	4:163207867	C	0.0347	0.5493	-	0.42 ± 0.08	3.58 × 10–8	-2.24 ± 0.79	0.004318	1.37 (0.67-2.79)	0.3915
	48	rs148751221	GALNTL6	4:173104417	T	0.01241	0.3268	Intron	0.60 ± 0.13	1.90 × 10–6	-0.83 ± 1.29	0.5206	0.71 (0.24-2.09)	0.5357
	49	rs2580045	LOC105377557	4:178141644	A	0.009306	0.1981	Intron	0.68 ± 0.14	2.74 × 10–6	-0.50 ± 1.48	0.7328	0.42 (0.08-2.17)	0.2993
	50	rs150617467	LINC02374	4:188059386	A	0.01318	0.3608	-	0.55 ± 0.12	8.58 × 10–6	-1.02 ± 1.26	0.4197	0.56 (0.16-1.99)	0.3701
	51	rs143929799	IRX1	5:3943251	A	0.0221	1	-	0.47 ± 0.10	1.22 × 10–6	-1.26 ± 0.99	0.2031	0.86 (0.36-2.09)	0.7439
	52	rs183620678	OXCT1	5:41697762	G	0.009306	1	-	0.67 ± 0.15	5.87 × 10–6	-1.55 ± 1.51	0.3035	0.82 (0.18-3.82)	0.7989
	53	rs76048748	AK4P2	5:54868103	T	0.02346	0.6507	-	0.41 ± 0.09	8.32 × 10–6	-1.97 ± 0.95	0.03763	1.31 (0.56-3.09)	0.5341
	54	rs254381	TBCA	5:77056766	C	0.03761	0.1756	Intron	0.34 ± 0.07	3.98 × 10–6	-1.05 ± 0.75	0.1607	1.36 (0.67-2.76)	0.4018
	55	rs337828	ARSB	5:78196735	G	0.009306	1	Intron	0.81 ± 0.15	3.55 × 10–8	-1.53 ± 1.51	0.3099	1.23 (0.35-4.39)	0.7488
	56	rs67060391	ARSB	5:78262068	C	0.01047	1	Intron	0.69 ± 0.14	6.56 × 10–7	-1.30 ± 1.42	0.3629	2.30 (0.68-7.76)	0.1806
	57	rs185038396	RAB9BP1	5:104383699	A	0.009694	0.2132	-	0.72 ± 0.14	3.05 × 10–7	-0.30 ± 1.45	0.8372	1.26 (0.30-5.18)	0.753
	58	rs192078066	SEMA6A-AS2	5:115922461	T	0.01105	1	Intron	0.64 ± 0.14	1.89 × 10–6	-1.37 ± 1.39	0.3212	1.38 (0.43-4.38)	0.5884
	59	rs73234479	DTWD2	5:118164708	T	0.01124	0.2768	-	0.72 ± 0.13	5.24 × 10–8	-2.26 ± 1.35	0.09373	1.67 (0.58-4.78)	0.3378
	60	rs191212466	ARHGEF37	5:149029556	G	0.01435	1	-	0.53 ± 0.12	7.58 × 10–6	0.00 ± 1.22	0.9983	0.82 (0.26-2.56)	0.7316
	61	5:154412932:A_AT	KIF4B	5:154412932	I	0.01086	1	-	0.63 ± 0.14	4.11 × 10–6	-4.07 ± 1.40	0.003595	3.23 (1.12-9.35)	0.03067
	62	rs75203093	SFXN1	5:174971738	T	0.01163	0.2933	-	0.66 ± 0.13	3.22 × 10–7	-2.46 ± 1.33	0.0643	1.04 (0.36-3.03)	0.9416
	63	rs79408342	RN7SL554P	6:6903907	G	0.02268	0.1428	-	0.43 ± 0.09	3.77 × 10–6	-1.71 ± 0.96	0.07485	1.98 (0.91-4.33)	0.08521
	64	rs115459999	GRM4	6:34015650	T	0.03858	1	Intron	0.34 ± 0.07	3.44 × 10–6	0.42 ± 0.75	0.5733	1.19 (0.59-2.40)	0.6174
	65	rs78958108	TEAD3	6:35458489	C	0.02288	0.3894	Intron	0.45 ± 0.09	1.50 × 10–6	-2.72 ± 0.96	0.004604	2.12 (0.88-5.12)	0.09571
	66	rs147415227	DNAH8, DNAH8-AS1	6:38906359	T	0.01377	0.3864	Intron	0.56 ± 0.12	4.40 × 10–6	-3.79 ± 1.24	0.002196	2.02 (0.74-5.50)	0.1687
	67	rs150983784	ATF1P1	6:93330189	G	0.01512	0.4463	-	0.59 ± 0.12	3.43 × 10–7	-0.62 ± 1.18	0.5996	1.14 (0.42-3.09)	0.8048
	68	rs9389187	FAXC	6:99722941	T	0.02036	1	Intron	0.50 ± 0.10	5.17 × 10–7	-4.02 ± 1.02	8.289e-05	2.76 (1.27-5.99)	0.01037
	69	rs150720040	NPM1P18	7:36839112	T	0.009112	1	-	0.67 ± 0.15	6.84 × 10–6	-2.57 ± 1.52	0.09213	2.48 (0.66-9.30)	0.1782
	70	rs146962517	CDK14	7:90821625	T	0.01163	0.04513	Intron	0.60 ± 0.13	3.08 × 10–6	-1.90 ± 1.31	0.1468	0.81 (0.24-2.77)	0.7375
	71	rs77838759	NIPA2P1	7:91185123	T	0.01493	1	-	0.52 ± 0.12	9.29 × 10–6	-1.12 ± 1.20	0.3485	1.63 (0.60-4.43)	0.3367
	72	rs1207687	RN7SL252P	7:96558775	A	0.01415	0.4036	-	0.56 ± 0.12	4.05 × 10–6	-1.48 ± 1.24	0.2307	1.26 (0.46-3.44)	0.655
	73	rs78010285	RELN	7:103388334	C	0.01687	0.03457	Intron	0.51 ± 0.11	2.03 × 10–6	-3.18 ± 1.09	0.003488	1.42 (0.55-3.68)	0.4654
	74	rs146720308	DOCK4	7:111660775	C	0.01183	1	Intron	0.71 ± 0.13	7.06 × 10–8	-1.06 ± 1.34	0.4309	1.12 (0.37-3.37)	0.8463
	75	rs188983059	CSMD1	8:3237293	G	0.01086	0.2605	Intron	0.65 ± 0.13	1.43 × 10–6	-2.14 ± 1.37	0.119	0.95 (0.29-3.14)	0.9386
	76	rs1811214411	CSMD1	8:3246979	D	0.01086	0.2605	Intron	0.70 ± 0.13	2.03 × 10–7	-3.18 ± 1.37	0.02035	0.96 (0.35-2.63)	0.9336
	77	rs74612056	CSMD1	8:3585777	G	0.02772	0.2641	Intron	0.40 ± 0.09	4.08 × 10–6	-1.83 ± 0.89	0.03993	1.75 (0.82-3.70)	0.1469
	78	rs79804045	NPBWR1	8:53788519	G	0.02094	0.3093	-	0.48 ± 0.10	1.06 × 10–6	-2.74 ± 1.00	0.006021	1.57 (0.65-3.77)	0.3172
	79	rs139686013	NUDT15P1	8:60596911	G	0.02889	0.1636	-	0.37 ± 0.08	6.66 × 10–6	-0.63 ± 0.85	0.4568	0.87 (0.41-1.83)	0.7121
	80	rs72666543	MTFR1, PDE7A, LOC107986949	8:66652457	A	0.01318	1	Intron	0.58 ± 0.12	3.61 × 10–6	-0.27 ± 1.27	0.8323	0.79 (0.23-2.77)	0.7154
	81	rs17621850	PTPRD	9:10237302	T	0.02714	0.2616	Intron	0.41 ± 0.09	3.09 × 10–6	-0.85 ± 0.90	0.3437	1.17 (0.51-2.68)	0.7125
	82	rs193290710	LINC01235	9:13511113	T	0.01183	1	-	0.64 ± 0.13	1.20 × 10–6	-2.14 ± 1.34	0.1105	1.91 (0.74-4.95)	0.1821
	83	rs143379776	ADAMTSL1	9:18160930	T	0.009694	1	Intron	0.71 ± 0.14	1.06 × 10–6	-0.66 ± 1.48	0.6576	1.84 (0.56-6.02)	0.3152
	84	rs149763281	SLC24A2	9:20104936	C	0.01124	0.2768	Intron	0.78 ± 0.13	3.88 × 10–9	-1.68 ± 1.36	0.2183	1.59 (0.47-5.36)	0.4521
	85	rs117465081	ELAVL2	9:24149024	C	0.01202	1	-	0.62 ± 0.13	1.78 × 10–6	-3.80 ± 1.33	0.004219	5.91 (2.00-17.47)	0.001322
	86	rs10813408	HSPA8P17	9:31000648	T	0.03083	0.1751	-	0.40 ± 0.08	1.53 × 10–6	-2.08 ± 0.85	0.01433	1.49 (0.68-3.30)	0.3217
	87	rs140711707	CNTFR	9:34553648	A	0.01299	0.3523	Intron	0.55 ± 0.12	8.48 × 10–6	-4.08 ± 1.26	0.001206	1.71 (0.54-5.40)	0.3613
	88	rs72721540	FAM240B	9:38750535	C	0.03974	0.7968	-	0.36 ± 0.07	9.52 × 10–7	-1.23 ± 0.74	0.09862	0.97 (0.48-1.96)	0.9341
	89	rs72748432	LOC101927450	9:81873498	A	0.01415	1	-	0.55 ± 0.12	7.52 × 10–6	-1.38 ± 1.25	0.268	0.66 (0.19-2.34)	0.5232
	90	rs191821898	LOC101927623	9:88765813	T	0.0126	1	Intron	0.56 ± 0.13	9.45 × 10–6	-0.81 ± 1.30	0.5349	0.54 (0.18-1.61)	0.2675
	91	rs183215227	ANKRD18CP	9:99896772	C	0.009888	1	-	0.74 ± 0.14	3.41 × 10–7	-2.60 ± 1.48	0.07788	1.11 (0.31-3.98)	0.8744
	92	rs56324627	ASTN2, ASTN2-AS1	9:119292374	G	0.01144	0.285	Intron	0.61 ± 0.13	3.22 × 10–6	-2.94 ± 1.34	0.02807	1.32 (0.42-4.19)	0.6349
	93	rs57413784	ASTN2	9:120246004	A	0.01144	1	-	0.66 ± 0.13	6.28 × 10–7	-1.93 ± 1.36	0.1573	2.61 (0.79-8.66)	0.1172
	94	rs7027651	SURF4	9:136232437	C	0.01629	1	Intron	0.50 ± 0.11	8.95 × 10–6	0.25 ± 1.16	0.8294	1.43 (0.53-3.86)	0.4785
	95	rs150694957	LASTR	10:5636941	C	0.01105	1	Downstream	0.61 ± 0.14	8.82 × 10–6	-3.09 ± 1.41	0.02819	1.71 (0.52-5.57)	0.3743
	96	rs151255691	GDI2	10:5883715	C	0.01183	1	-	0.60 ± 0.13	6.67 × 10–6	-2.31 ± 1.36	0.08986	1.53 (0.55-4.30)	0.4189
	97	rs145373218	CAMK1D	10:12521155	G	0.0159	0.4802	Intron	0.57 ± 0.11	3.57 × 10–7	-2.79 ± 1.15	0.01482	1.90 (0.71-5.12)	0.2021
	98	rs138451024	PLXDC2	10:20097902	G	0.00853	1	Intron	0.76 ± 0.15	6.83 × 10–7	-1.43 ± 1.57	0.3621	5.24 (1.47-18.66)	0.01067
	99	rs76560353	ODAD2P1	10:27554175	C	0.02249	0.6395	Intron	0.43 ± 0.10	7.06 × 10–6	-0.99 ± 0.99	0.3133	1.03 (0.45-2.37)	0.9477
	100	rs10822525	LOC105378337	10:67151208	C	0.01667	0.5135	-	0.64 ± 0.11	6.19 × 10–9	-1.67 ± 1.12	0.1366	1.17 (0.45-3.03)	0.7532
	101	rs144476004	LOC107984181	10:85676732	D	0.009888	1	Upstream	0.66 ± 0.14	4.59 × 10–6	-2.40 ± 1.46	0.1005	1.71 (0.47-6.22)	0.415
	102	rs72200649	SORCS1	10:108161924	D	0.019	0.2348	-	0.46 ± 0.10	7.33 × 10–6	-0.27 ± 1.05	0.7945	1.37 (0.55-3.45)	0.5003
	103	rs79220811	RN7SKP278	10:110749664	A	0.009888	1	-	0.65 ± 0.14	4.83 × 10–6	-1.48 ± 1.46	0.3132	1.70 (0.51-5.63)	0.3851
	104	rs139299403	HSPA12A	10:118600519	C	0.01667	0.5135	Intron	0.50 ± 0.11	5.97 × 10–6	1.11 ± 1.12	0.3226	1.24 (0.50-3.08)	0.6493
	105	rs78948326	SLC25A18P1	10:120304682	C	0.01377	1	-	0.54 ± 0.12	7.52 × 10–6	-2.73 ± 1.24	0.02806	1.59 (0.52-4.88)	0.4153
	106	rs145031422	LINC02641	10:125222339	C	0.0126	0.06039	Intron	0.55 ± 0.12	7.50 × 10–6	-1.07 ± 1.26	0.3945	2.49 (0.87-7.09)	0.08863
	107	rs76200350	LOC100419870	10:132377975	D	0.01939	1	-	0.52 ± 0.10	4.40 × 10–7	-1.37 ± 1.06	0.1976	1.52 (0.56-4.13)	0.4074
	108	rs147662100	PRCP	11:82547613	G	0.01706	1	Intron	0.51 ± 0.11	4.30 × 10–6	-2.16 ± 1.13	0.05676	2.47 (0.95-6.43)	0.06447
	109	rs146321869	LOC101928535	11:106108552	G	0.008918	0.1833	-	0.83 ± 0.15	1.61 × 10–8	-3.34 ± 1.51	0.02634	1.56 (0.48-5.01)	0.4591
	110	rs138307719	DSCAML1	11:117648494	A	0.01124	1	Intron	0.69 ± 0.13	2.40 × 10–7	-1.79 ± 1.37	0.1931	1.28 (0.37-4.50)	0.6965
	111	rs11611630	MIR3974	12:17937277	C	0.007949	1	-	0.71 ± 0.16	9.63 × 10–6	-1.28 ± 1.63	0.4341	5.31 (1.21-23.37)	0.02719
	112	rs199654440	SULT6B2P	12:22266321	I	0.01124	1	Intron	0.62 ± 0.13	3.32 × 10–6	-1.32 ± 1.37	0.3368	0.81 (0.27-2.42)	0.6995
	113	rs142281854	SOX5	12:24528593	A	0.01318	1	Intron	0.60 ± 0.12	1.62 × 10–6	-2.86 ± 1.27	0.02439	1.52 (0.48-4.86)	0.4775
	114	rs75428977	DIP2B	12:51134430	C	0.03024	0.172	Intron	0.37 ± 0.08	9.19 × 10–6	-3.08 ± 0.85	0.0003184	2.25 (1.11-4.56)	0.02442
	115	rs79198869	ATF1	12:51161393	G	0.01086	1	Intron	0.73 ± 0.14	1.03 × 10–7	-4.00 ± 1.40	0.004267	2.47 (0.79-7.72)	0.1191
	116	rs148847403	SLC16A7	12:60911741	A	0.01861	0.2209	-	0.48 ± 0.10	2.79 × 10–6	-0.10 ± 1.05	0.9273	1.35 (0.53-3.45)	0.5311
	117	rs12581944	TAFA2	12:61851308	C	0.0126	1	-	0.58 ± 0.13	4.18 × 10–6	0.94 ± 1.30	0.4678	1.30 (0.37-4.52)	0.6852
	118	rs139143871	E2F7	12:77593060	T	0.01745	1	-	0.49 ± 0.11	6.08 × 10–6	0.15 ± 1.12	0.8946	0.75 (0.21-2.63)	0.6508
	119	rs142060479	LOC100128335	12:84965581	T	0.01532	1	-	0.54 ± 0.12	3.01 × 10–6	-1.19 ± 1.18	0.3172	1.07 (0.39-2.91)	0.892
	120	rs61933374	ANKS1B	12:99466345	A	0.01124	0.2768	Intron	0.67 ± 0.13	3.23 × 10–7	-4.44 ± 1.35	0.001017	1.64 (0.63-4.29)	0.3113
	121	rs7967915	LINC02463	12:116313715	C	0.02326	0.6482	Intron	0.48 ± 0.09	3.03 × 10–7	-1.75 ± 0.96	0.06767	1.98 (0.86-4.57)	0.1095
	122	rs75236442	LINC02393	12:128344574	C	0.01629	0.02879	-	0.50 ± 0.11	3.92 × 10–6	-1.44 ± 1.11	0.1955	1.99 (0.81-4.85)	0.1316
	123	rs116998426	SGCG	13:23759635	T	0.0316	0.5175	Intron	0.40 ± 0.08	9.40 × 10–7	-3.23 ± 0.83	0.0001015	1.53 (0.68-3.44)	0.309
	124	rs117150322	TNFRSF19	13:24120841	A	0.009112	0.1906	-	0.83 ± 0.15	9.89 × 10–9	-3.22 ± 1.49	0.03071	1.86 (0.37-9.27)	0.4466
	125	rs80114040	POLR1D	13:28261984	A	0.01105	1	-	0.63 ± 0.14	4.18 × 10–6	-1.69 ± 1.40	0.2258	0.62 (0.12-3.31)	0.5797
	126	rs4512995	TNFSF11	13:43134443	G	0.02792	0.4505	-	0.38 ± 0.08	5.94 × 10–6	-1.59 ± 0.87	0.06756	1.03 (0.45-2.36)	0.9458
	127	rs76071340	TNFSF11	13:43217688	G	0.01435	0.09532	-	0.61 ± 0.12	1.36 × 10–7	-2.44 ± 1.19	0.04014	1.35 (0.40-4.53)	0.6243
	128	rs71439533	RPL13AP25	13:55271016	T	0.01318	1	-	0.60 ± 0.12	1.54 × 10–6	-2.49 ± 1.27	0.04995	0.97 (0.30-3.11)	0.9578
	129	rs74577657	HNF4GP1	13:56384784	G	0.01008	1	-	0.66 ± 0.14	3.72 × 10–6	-3.11 ± 1.45	0.03183	0.78 (0.22-2.77)	0.7026
	130	rs149648532	TPP2	13:103275516	G	0.01066	0.2525	Intron	0.71 ± 0.13	1.53 × 10–7	-0.50 ± 1.39	0.7178	2.22 (0.64-7.74)	0.2113
	131	rs117994259	LINC00551	13:107289452	A	0.01086	1	-	0.69 ± 0.14	4.81 × 10–7	0.97 ± 1.40	0.4872	0.72 (0.15-3.32)	0.6683
	132	rs145013998	STXBP6	14:25343087	A	0.0157	0.4717	Intron	0.52 ± 0.11	3.40 × 10–6	-2.00 ± 1.15	0.08259	1.65 (0.63-4.26)	0.3057
	133	rs9743886	RAD51B	14:68897019	G	0.02094	1	Intron	0.52 ± 0.10	1.49 × 10–7	0.24 ± 1.01	0.8128	1.25 (0.55-2.85)	0.5902
	134	rs11856415	LINC00927	15:80615812	T	0.03199	0.1116	Intron	0.39 ± 0.08	1.83 × 10–6	-1.03 ± 0.83	0.2175	2.61 (1.25-5.46)	0.01092
	135	rs146770030	XYLT1	16:17134149	T	0.008724	1	-	0.68 ± 0.15	7.99 × 10–6	-2.56 ± 1.56	0.1003	2.42 (0.77-7.63)	0.1315
	136	rs75806488	GPR139	16:20103925	T	0.01008	1	-	0.70 ± 0.14	7.24 × 10–7	-2.72 ± 1.45	0.06036	5.83 (1.40-24.38)	0.01567
	137	rs112596297	LOC100526838	16:48509115	A	0.01028	1	-	0.63 ± 0.14	9.17 × 10–6	-1.89 ± 1.46	0.1967	1.37 (0.44-4.23)	0.5834
	138	rs118015915	MPHOSPH6	16:82392143	G	0.01454	0.4207	-	0.57 ± 0.12	1.22 × 10–6	-1.53 ± 1.20	0.2009	1.48 (0.55-3.98)	0.4357
	139	rs56313470	CDH13	16:83677010	D	0.009694	1	Intron	0.67 ± 0.14	3.70 × 10–6	-5.02 ± 1.47	0.0006694	2.28 (0.61-8.52)	0.2199
	140	rs77515164	CCT6B	17:33022795	T	0.01357	1	-	0.63 ± 0.12	2.47 × 10–7	-0.67 ± 1.25	0.5958	1.26 (0.37-4.30)	0.7146
	141	rs9890576	MSI2	17:55442424	C	0.02966	0.2848	Intron	0.39 ± 0.08	1.81 × 10–6	-0.87 ± 0.84	0.3019	1.24 (0.60-2.54)	0.559
	142	rs2069903945	CEP112	17:64123658	R	0.01396	1	Intron	0.56 ± 0.12	4.08 × 10–6	-1.22 ± 1.24	0.3229	1.38 (0.47-4.03)	0.5554
	143	rs80021847	RNF157	17:74205732	T	0.01338	1	Intron	0.66 ± 0.12	1.18 × 10–7	-3.35 ± 1.27	0.008467	0.77 (0.28-2.16)	0.6223
	144	rs148994978	LOC112577592	18:7462732	A	0.009112	1	Upstream	0.76 ± 0.15	4.00 × 10–7	-3.54 ± 1.54	0.0215	0.48 (0.12-1.85)	0.2864
	145	rs74482576	AQP4	18:24439749	G	0.01609	0.4885	Intron	0.57 ± 0.11	2.67 × 10–7	-1.86 ± 1.14	0.1037	1.25 (0.43-3.60)	0.6818
	146	rs184262508	RNU6-408P	18:26710644	G	0.01512	1	-	0.58 ± 0.12	6.70 × 10–7	-1.20 ± 1.19	0.3114	1.33 (0.43-4.08)	0.616
	147	rs140816871	LOC339298	18:73691271	A	0.02617	0.6945	-	0.42 ± 0.09	1.65 × 10–6	-2.41 ± 0.91	0.007971	2.14 (0.99-4.62)	0.05376
	148	rs149071007	ZNF708	19:21443410	G	0.0157	0.4717	-	0.54 ± 0.11	1.96 × 10–6	-2.92 ± 1.15	0.01147	1.14 (0.42-3.13)	0.7925
	149	rs79124984	DHX35	20:37704151	G	0.01318	1	-	0.56 ± 0.13	8.90 × 10–6	-2.22 ± 1.29	0.08545	1.55 (0.44-5.51)	0.4955
	150	rs57287359	PTPRT	20:41062975	G	0.01028	1	Intron	0.64 ± 0.14	5.05 × 10–6	-0.75 ± 1.44	0.6005	0.63 (0.15-2.63)	0.5239
	SNP, single nucleotide polymorphism; MAF, minor allele frequency; HWE, Hardy-Weinberg equilibrium; IDO, indoleamine 2,3-dioxygenase; CKD, chronic kidney disease; eGFR, estimated glomerular filtration rate; β, regression coefficient; S.E, standard error; OR, odds ratio; CI, confidence interval. All analyses were adjusted for age, area, gender, BMI, drinking, smoking, SBP, hs-CRP, and HbA1c. Cutoff…
